# Supplementary material for: Spatial Patterns of Frangula alnus (Rosales: Rhamnaceae): Implications for Invasive Plant Management
Source: MDPI journal article supplement (doi:10.3390/biology12111393), 2023-11-01
Supplement: s1 [file s1]

**Table S1.** Parameters of anisotropic semivariograms for Buckthorn Index (*BI*) and percent presence of *F. alnus*.

| Variable                        | Site | Model       | Nugget | Sill   | Major Range (m) | Minor Range (m) | Anisotropy Factor | R <sup>2</sup> | RSS *   |
|---------------------------------|------|-------------|--------|--------|-----------------|-----------------|-------------------|----------------|---------|
| Buckthorn Index ( <i>BI</i> )   | 1    | Spherical   | 114.8  | 609.3  | 410.7           | 256.1           | 0.62              | 0.88           | 103558  |
|                                 | 2    | Nugget      | 66.4   | 170.6  | 1960.0          | 1022.0          | 0.52              | 0.26           | 8625    |
|                                 | 3    | Exponential | 472.4  | 1383.4 | 735.0           | 735.0           | 1                 | 0.60           | 732064  |
|                                 | 4    | Exponential | 201.2  | 637.5  | 751.0           | 751.0           | 1                 | 0.66           | 107808  |
| Presence of <i>F. alnus</i> (%) | 1    | Nugget      | 0.124  | 0.332  | 867.2           | 668.5           | 0.77              | 0.44           | 0.00094 |
|                                 | 2    | Nugget      | 0.164  | 0.435  | 527.6           | 527.6           | 1                 | 0.94           | 0.05310 |
|                                 | 3    | Gaussian    | 0.107  | 0.608  | 754.6           | 754.6           | 1                 | 0.48           | 0.3070  |
|                                 | 4    | Nugget      | 0.179  | 0.451  | 499.2           | 499.2           | 1                 | 0.42           | 0.0464  |

\* RSS: Residual sum of squares
